# Supplementary material for: Cyano-Bridged Cu-Ni Coordination Polymer Nanoflakes and Their Thermal Conversion to Mixed Cu-Ni Oxides
Source: Nanomaterials (Basel). 2018 Nov 23;8(12):968. doi: 10.3390/nano8120968 (PMC6315628; doi:10.3390/nano8120968)
Supplement: Supplementary file 1 [file nanomaterials-08-00968-s001.pdf]

# Cyano-Bridged Cu-Ni Coordination Polymer Nanoflakes and Their Thermal Conversion to Mixed Cu-Ni Oxides

Alowasheer Azhar <sup>1,2,3</sup>, Christine Young <sup>2</sup>, Yusuf Valentino Kaneti <sup>2</sup>, Yusuke Yamauchi <sup>1,4,5,\*</sup>, Ahmad Yacine Badjah <sup>6</sup>, Mu Naushad <sup>6</sup>, Mohamed Habila <sup>6</sup>, Saikh Wabaidur <sup>6</sup>, Zeid A. Alothman <sup>6</sup> and Jeonghun Kim <sup>1,4,\*</sup>

<sup>1</sup> Key Laboratory of Eco-chemical Engineering, College of Chemistry and Molecular Engineering, College of Chemistry and Molecular Engineering, Qingdao University of Science and Technology, Qingdao 266042, China; horiatlbher@hotmail.com (A.A.)

<sup>2</sup> International Research Center for Materials Nanoarchitectonics (WPI-MANA), National Institute for Materials Science (NIMS), 1-1 Namiki, Tsukuba, Ibaraki 305-0044, Japan; peicing@livemail.tw (C.Y.); KANETI.Valentino@nims.go.jp (Y.V.K.)

<sup>3</sup> Faculty of Science and Engineering, Waseda University, 3-4-1 Okubo, Shinjuku, Tokyo, 169-8555, Japan;

<sup>4</sup> School of Chemical Engineering and Australian Institute for Bioengineering and Nanotechnology (AIBN), The University of Queensland, Brisbane, QLD 4072, Australia

<sup>5</sup> Department of Plant & Environmental New Resources, Kyung Hee University, 1732 Deogyong-daero, Giheung-gu, Yongin-si, Gyeonggi-do 446-701, Korea

<sup>6</sup> Advanced Material Research Chair, Chemistry Department P. O. Box 2455, College of Science, King Saud University (KSU), Riyadh 11451, Saudi Arabia; ybadjah@ksu.edu.sa (A.Y.B.); mnaushad@ksu.edu.sa (M.N.); mhabila@ksu.edu.sa (M.H.); tarabai22@yahoo.com.sg (S.W.); zaothman@ksu.edu.sa (Z.A.A.)

\* Correspondence: y.yamauchi@uq.edu.au (Y.Y.); jeonghun.kim@uq.edu.au (J.K.)

Received: 1 October 2018; Accepted: 14 November 2018; Published: 23 November 2018

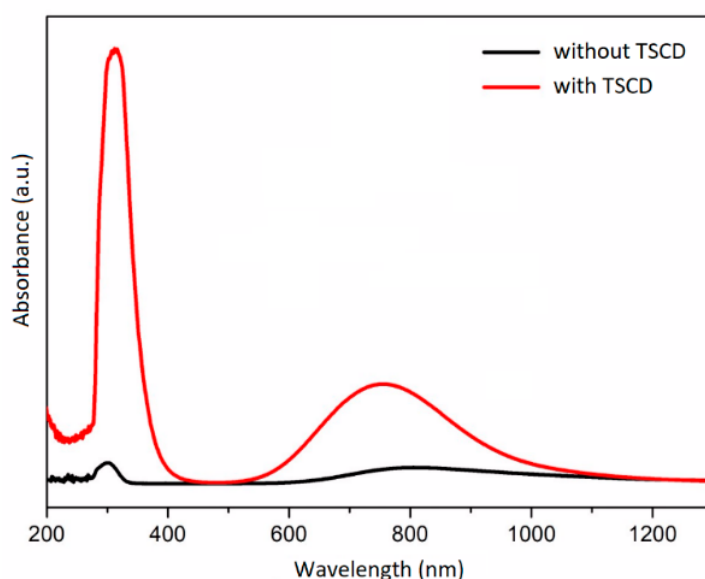

**Figure S1.** UV-vis spectra of  $\text{Cu}(\text{NO}_3)_2$  solution with and without TSCD.

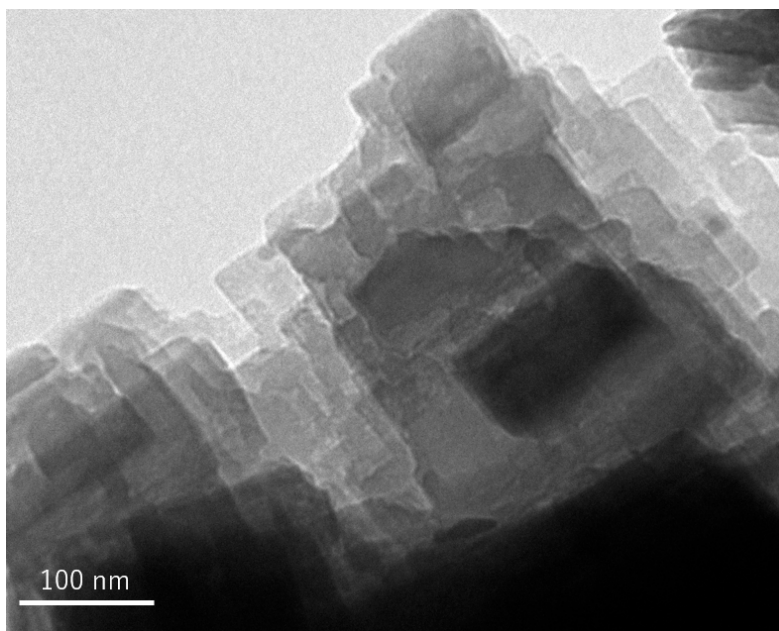

**Figure S2.** TEM image of Cu-Ni<sub>0.2</sub>.

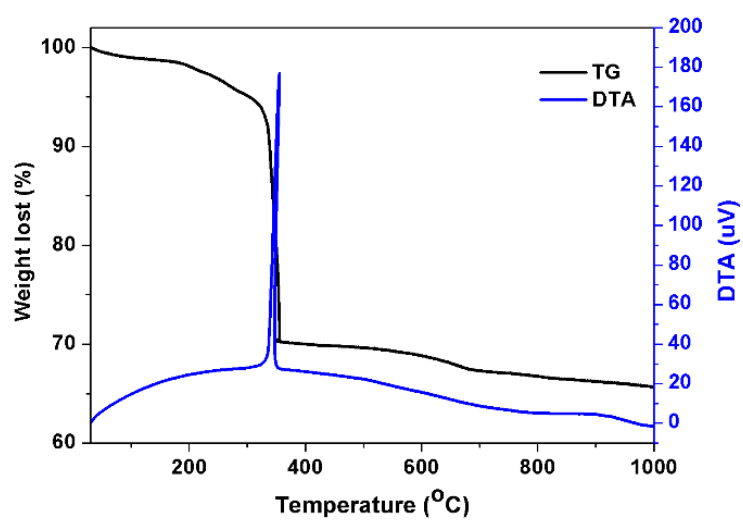

**Figure S3.** TG-DTA data of Cu-Ni<sub>0.2</sub>. The measurement was carried out in air.

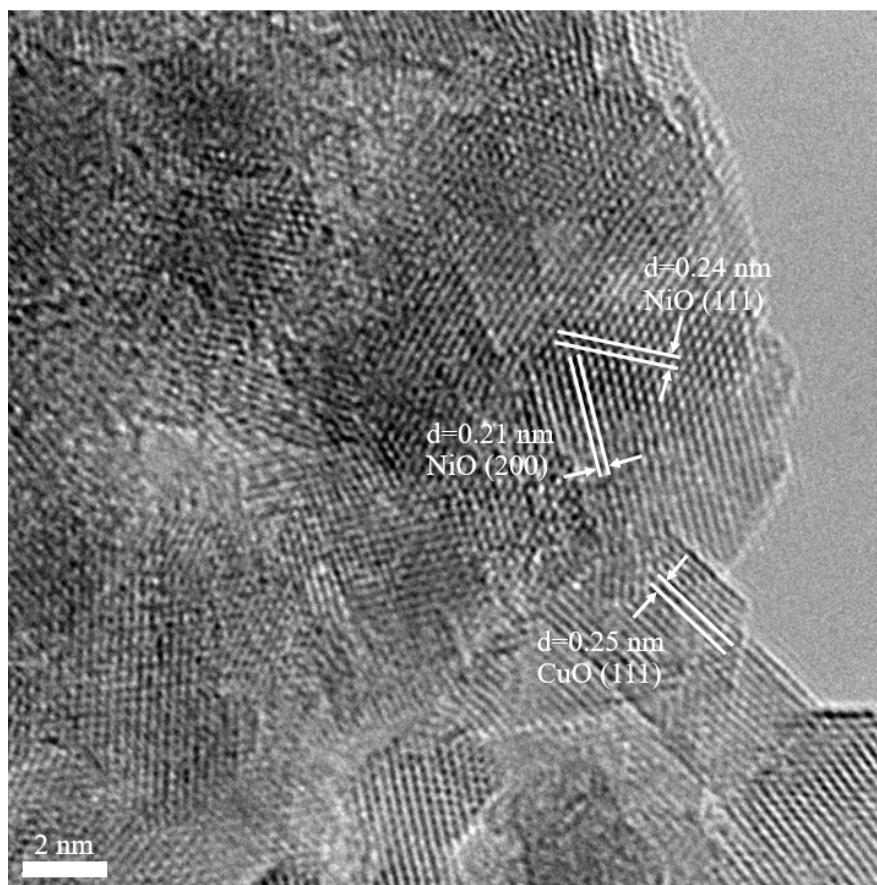

**Figure S4.** TEM image of Cu-Ni<sub>0.2</sub>300.

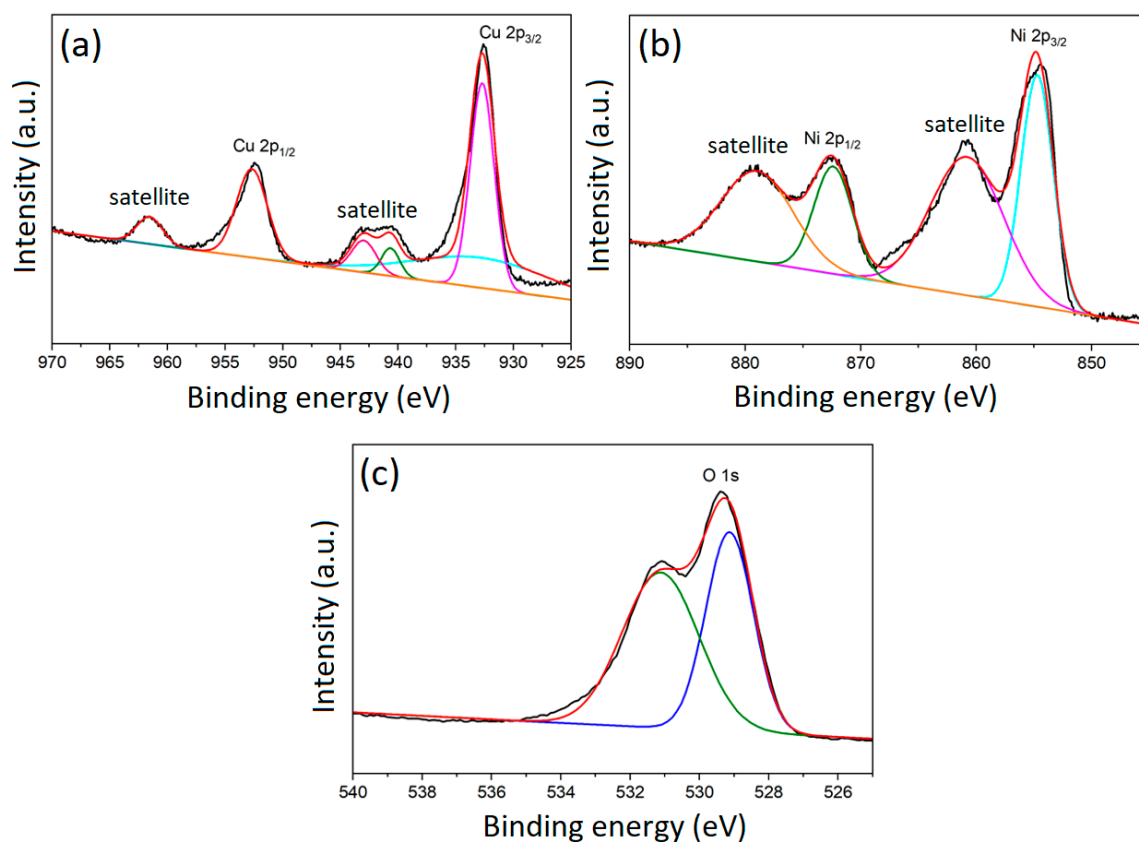

**Figure S5.** High-resolution XPS spectra for (a) Cu 2p, (b) Ni 2p and (c) O 1s of Cu-Ni<sub>0.20</sub>300.
